# Supplementary material for: In Silico Analysis Reveals the Modulation of Ion Transmembrane Transporters in the Cerebellum of Alzheimer’s Disease Patients
Source: MDPI journal article supplement (doi:10.3390/ijms241813924), 2023-09-10
Supplement: s1 [file s1]

**Table S1.** Fold changes and q value in the different brain areas of the 21 genes belonging to the MF “active ion transmembrane transporter activity”, resulted as DEGs in cerebellum.

| Gene            | Cerebellum   |             | Visual cortex      |                     | Prefrontal cortex |         |
|-----------------|--------------|-------------|--------------------|---------------------|-------------------|---------|
|                 | Fold Change  | q value     | Fold Change        | q value             | Fold Change       | q value |
| <i>ABCC3</i>    | 0.013991175  | 0.018415761 | -                  | > 0.05              | -                 | > 0.05  |
| <i>ABCC6</i>    | 0.012650605  | 0.04160476  | -                  | > 0.05              | -                 | > 0.05  |
| <i>ATP12A</i>   | -0.006174467 | 0.042804469 | -                  | > 0.05              | -                 | > 0.05  |
| <i>ATP13A2</i>  | 0.251463979  | 0.035049666 | -                  | > 0.05              | -                 | > 0.05  |
| <i>ATP1A3</i>   | 0.09634255   | 0.041888111 | -                  | > 0.05              | -                 | > 0.05  |
| <i>ATP6V0D2</i> | -0.006374808 | 0.008250677 | -                  | > 0.05              | -                 | > 0.05  |
| <i>ATP7A</i>    | -0.015102459 | 0.036627874 | -                  | > 0.05              | -                 | > 0.05  |
| <i>KCNJ8</i>    | -0.012363192 | 0.047113632 | -                  | > 0.05              | -                 | > 0.05  |
| <i>SLC11A1</i>  | 0.021200058  | 0.012683541 | -                  | > 0.05              | -                 | > 0.05  |
| <i>SLC12A4</i>  | 2.499045432  | 0.018632738 | 0.0443270969614519 | 0.00827453181921639 | -                 | > 0.05  |
| <i>SLC22A18</i> | 0.04532508   | 0.009564829 | -                  | > 0.05              | -                 | > 0.05  |
| <i>SLC22A8</i>  | 0.014382656  | 0.009790237 | -                  | > 0.05              | -                 | > 0.05  |
| <i>SLC22A9</i>  | 0.009494155  | 0.030875899 | -                  | > 0.05              | -                 | > 0.05  |
| <i>SLC25A13</i> | -0.017539692 | 0.025486565 | -                  | > 0.05              | -                 | > 0.05  |
| <i>SLC34A1</i>  | 0.013895368  | 0.018821196 | -                  | > 0.05              | -                 | > 0.05  |
| <i>SLC36A3</i>  | -0.00704993  | 0.007590429 | -                  | > 0.05              | -                 | > 0.05  |
| <i>SLC3A2</i>   | 0.100642774  | 0.040843147 | 0.141893882928591  | 0.0109535278650002  | -                 | > 0.05  |
| <i>SLC4A1</i>   | 0.105817307  | 0.008598399 | -                  | > 0.05              | -                 | > 0.05  |
| <i>SLC4A10</i>  | -0.005783852 | 0.004750603 | -                  | > 0.05              | -                 | > 0.05  |
| <i>SLC8A3</i>   | 0.014647883  | 0.031575018 | -                  | > 0.05              | -                 | > 0.05  |
| <i>SLCO1A2</i>  | 0.03306782   | 0.03695757  | -                  | > 0.05              | -                 | > 0.05  |
